# Supplementary material for: An enzyme-mediated bioorthogonal labeling method for genome-wide mapping of 5-hydroxymethyluracil
Source: Royal Society of Chemistry journal article supplement (doi:10.1039/d1sc03812e), 2021-01-01

**Supporting Information**

**for**

**Enzyme-mediated bioorthogonal labeling method for genome-wide mapping of 5-hydroxymethyluracil**

Cheng-Jie Ma,<sup>1,†</sup> Lin Li,<sup>2,†</sup> Wen-Xuan Shao,<sup>1</sup> Jiang-Hui Ding,<sup>1</sup> Xiao-Li Cai,<sup>3</sup> Zhao-Rong

Lun,<sup>3</sup> Bi-Feng Yuan,<sup>\*,1,4</sup> Yu-Qi Feng<sup>1,4</sup>

<sup>1</sup> Sauvage Center for Molecular Sciences, Department of Chemistry, Wuhan University, Wuhan 430072, China.

<sup>2</sup> School of Pharmacy, Shanghai Jiao Tong University, Shanghai 200240, P.R. China.

<sup>3</sup> Center for Parasitic Organisms, State Key Laboratory of Biocontrol, School of Life Sciences, Sun Yat-Sen University, Guangzhou 510275, P.R. China.

<sup>4</sup> School of Public Health, Wuhan University, Wuhan 430071, China.

<sup>†</sup> These authors contributed equally to this work.

\* Corresponding author: Bi-Feng Yuan. Tel: +86-27-68755595; Fax: +86-27-68755595; E-mail: bfyuan@whu.edu.cn

The Supporting Information includes following items:

---

|          |                                                                                                                                                                                 |
|----------|---------------------------------------------------------------------------------------------------------------------------------------------------------------------------------|
| Page S3  | Table S1. Sequences of oligonucleotides.                                                                                                                                        |
| Page S4  | Table S2. Primers for real-time qPCR.                                                                                                                                           |
| Page S5  | Table S3. High-throughput sequencing data.                                                                                                                                      |
| Page S6  | Figure S1. Quantitative evaluation of the phosphorylation of 5hmU by 5hmUDK using the mixture of duplex T-DNA and duplex 5hmU-DNA.                                              |
| Page S7  | Figure S2. Phosphorylation of 5hmU in single-stranded DNA (ssDNA) by 5hmUDK at different times (0.5 h and 12 h) using ATP, alkynyl-ATP, or N <sub>3</sub> -ATP as the cofactor. |
| Page S8  | Figure S3. Reversal of phosphorylation of 5hmU in 5hmU-DNA by alkaline phosphatase.                                                                                             |
| Page S9  | Figure S4. Bioorthogonal reaction between N <sub>3</sub> -5hmU and DBCO-Cy3.                                                                                                    |
| Page S10 | Figure S5. LC-UV trace of 5hmU-DNA before (A) and after reaction with N <sub>3</sub> -ATP and DBCO-SS-biotin (B).                                                               |
| Page S11 | Figure S6. Evaluation of the preference of the phosphorylation of 5hmU with ATP or N <sub>3</sub> -ATP as the cofactor by 5hmUDK.                                               |
| Page S12 | Figure S7. Evaluation of the real-time qPCR amplification efficiencies.                                                                                                         |
| Page S13 | Figure S8. The schematic diagram of library preparation for high-throughput sequencing.                                                                                         |
| Page S14 | Figure S9. The adaptors and primers used for high-throughput sequencing.                                                                                                        |
| Page S15 | Figure S10. The spearman correlation analysis between four samples (input 1, input 2, pull-down 1 and pull-down 2).                                                             |
| Page S16 | Figure S11. Verification of 5hmU peaks in <i>T. brucei</i> genome by real-time qPCR.                                                                                            |
| Page S17 | Figure S12. The IGVtools view of 5hmU peaks in pull-down samples compared to input sample.                                                                                      |
| Page S18 | Figure S13. Enrichment of 5hmU-containing DNA fragments with using ATP instead of N <sub>3</sub> -ATP.                                                                          |

---

**Table S1.** Sequences of oligonucleotides.

| Name                     | Sequence (5' to 3')                                                                                                                           |
|--------------------------|-----------------------------------------------------------------------------------------------------------------------------------------------|
| 34nt T-DNA               | CGATCTCACCA <b>T</b> GGCCTTAACTCAGAAGCCCTAG                                                                                                   |
| 34nt U-DNA               | CGATCTCACCA <b>U</b> GGCCTTAACTCAGAAGCCCTAG                                                                                                   |
| 34nt 5hmU-DNA            | CGATCTCACCA <b>5hmU</b> GGCCTTAACTCAGAAGCCCTAG                                                                                                |
| 34nt complementary-A-DNA | FAM-CTAGGGCTTCTGAGTTAAGGCC <b>A</b> TGGTGAGATCG                                                                                               |
| 34nt complementary-G-DNA | FAM-CTAGGGCTTCTGAGTTAAGGCC <b>G</b> TGGTGAGATCG                                                                                               |
| 60nt 5hmU-DNA            | CCTCACCATCTCAACCAATATTATACCA <b>5hmU</b> GGTATGCGT<br>TATAATGAGGGAGAAGTGGTGA                                                                  |
| 60nt complementary-A-DNA | TCACCACTTCTCCCTCATTATAACGCATACC <b>A</b> TGGTATAAT<br>ATTGGTTGAGATGGTGAGG                                                                     |
| 60nt complementary-G-DNA | TCACCACTTCTCCCTCATTATAACGCATACC <b>G</b> TGGTATAAT<br>ATTGGTTGAGATGGTGAGG                                                                     |
| 129nt control-DNA        | CGGACACTATCAGTCTACGTTAATCACTATAAGCGACGTTC<br>ATTGGTGTCGGGCTGTGTTTCGTAATCGTACCAGAGTATGT<br>GCGGGTGGTGGCCCTAGGGCTTCTGAGTTAAGGCCATGGT<br>GAGATCG |

**Table S2.** Primers for PCR.

| Name                          | Sequence (5' to 3')                                                  |
|-------------------------------|----------------------------------------------------------------------|
| IP241 forward primer          | TCAGCTCAAGCTCTTCTGCA                                                 |
| IP241 reverse primer          | CTTGAGCTGAAGGCTGCCGA                                                 |
| IP1081 forward primer         | GCACATCACGCTTATATGCG                                                 |
| IP1081 reverse primer         | CCAGTCACTTCCGCTCAACC                                                 |
| IP630 forward primer          | CTTCATCATGGCTTCGCTGA                                                 |
| IP630 reverse primer          | AAATGTTCGTGAAGTTATGGA                                                |
| IP263 forward primer          | CTTCCTCAGCCTCCACGC                                                   |
| IP263 reverse primer          | AGAAGATGCTGAGCGCATGAA                                                |
| IP674 forward primer          | AGATGCCGTGTGTGCGTGTT                                                 |
| IP674 reverse primer          | GCTGTTACCTCCTCGCGCAC                                                 |
| IP1228 forward primer         | CGGAGGACTTCATAGCGGAGG                                                |
| IP1228 reverse primer         | TCCATGATGGCTTCGGTTTGCTG                                              |
| IP1309 forward primer         | CCGATAGCCGCAGCTTCCTTG                                                |
| IP1309 reverse primer         | GACGCTCCTCTTCCATGGTGC                                                |
| Up-IP241 forward primer       | CGGCAACTACGCCAAAACCTG                                                |
| Up-IP241 reverse primer       | GACAAATGGGGCAGAAGCAC                                                 |
| Up-IP1081 forward primer      | CGTGGCTATCACTGGACACAA                                                |
| Up-IP1081 reverse primer      | CTCCTGTGCTAACTGTGCTGA                                                |
| Up-IP630 forward primer       | GCCCACTGCTCTGAATGTGTAT                                               |
| Up-IP630 reverse primer       | CCGCATATTTGTAGCTTCCGT                                                |
| Up-IP263 forward primer       | GCACTACCAGTCGGTTCTCG                                                 |
| Up-IP263 reverse primer       | AGTAGAGTTAGCGGTTTGCCC                                                |
| Up-IP674 forward primer       | TCACATGACTACGTTGGTTCG                                                |
| Up-IP674 reverse primer       | ATGGCCAGTGCCAGTTCTTT                                                 |
| Up-IP1228 forward primer      | CAGAAGGCACCAGCGACAA                                                  |
| Up-IP1228 reverse primer      | GTAGGTTCTGCGTAAGCGATGT                                               |
| Up-IP1309 forward primer      | AGTCGTTTGGCTGAGGTTGA                                                 |
| Up-IP1309 reverse primer      | AAGGAAGCAACTCAAGGGGG                                                 |
| 60nt forward primer           | CCTCACCATCTCAACCAATA                                                 |
| 60nt reverse primer           | TCACCACTTCTCCCTCATTA                                                 |
| 129nt forward primer          | CGGACACTATCAGTCTACGT                                                 |
| 129nt reverse primer          | CGATCTCACCATGGCCTTAA                                                 |
| P7-index primer (input 1)     | CAAGCAGAAGACGGCATAACGTGAT<br>GTGACTGGAGTTCAGACGTGTGCTCTTCCGATC<br>T  |
| P7-index primer (input 2)     | CAAGCAGAAGACGGCATAACATCG<br>GTGACTGGAGTTCAGACGTGTGCTCTTCCGATC<br>T   |
| P7-index primer (pull-down 1) | CAAGCAGAAGACGGCATAAGTGGTCA<br>GTGACTGGAGTTCAGACGTGTGCTCTTCCGATC<br>T |
| P7-index primer (pull-down 2) | CAAGCAGAAGACGGCATAACCACTGT                                           |

|                     |                                   |
|---------------------|-----------------------------------|
| P5-universal primer | GTGACTGGAGTTCAGACGTGTGCTCTTCCGATC |
|                     | T                                 |
|                     | AATGATACGGCGACCACCGAGATCTACACTCTT |
|                     | TCCCTACACGACGCTCTTCCGATCT         |

**Table S3.** High-throughput sequencing data.

| Library name | Raw reads | Clean reads | Mapped reads      |
|--------------|-----------|-------------|-------------------|
| Input 1      | 14302993  | 9423177     | 7303202 (77.50%)  |
| Input 2      | 15365837  | 8710311     | 6437940 (73.91%)  |
| Pull-down 1  | 22144857  | 15042102    | 10838743 (72.06%) |
| Pull-down 2  | 21858322  | 11347664    | 7245368 (63.85%)  |

**Figure S1.** Quantitative evaluation of the phosphorylation of 5hmU by 5hmUDK using the mixture of duplex T-DNA and duplex 5hmU-DNA. (A) Analysis of the phosphorylation of 5hmU by 5hmUDK with NcoI cleavage assay. Duplex T-DNA and 5hmU-DNA were mixed at different ratios (0, 20, 40, 60, 80, and 100% of 5hmU-DNA) and then processed with 5hmUDK treatment at 37°C for 30 min. The resulting DNA was incubated with NcoI followed by polyacrylamide gel electrophoresis analysis. (B) The cleaved fractions of 5hmU-DNA were plotted against the percentage of 5hmU-DNA. The slope of -0.96 indicated that the levels of 5hmU-DNA in DNA mixture could be quantitatively obtained using the 5hmUDK assay.

(A)

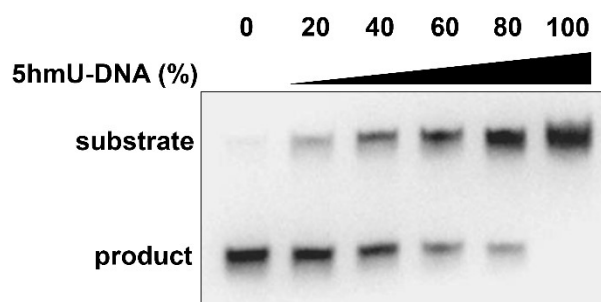

(B)

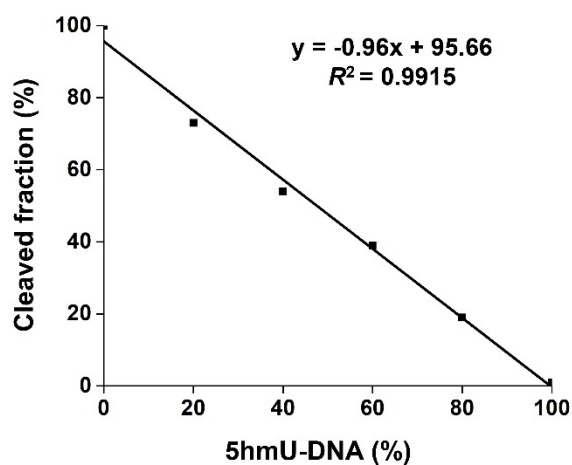

**Figure S2.** Phosphorylation of 5hmU in single-stranded DNA (ssDNA) by 5hmUDK at different times (0.5 h and 12 h) using ATP, alkynyl-ATP, or N<sub>3</sub>-ATP as the cofactor. NcoI cleavage assay was used to evaluate the phosphorylation of 5hmU. I, ATP; II, alkynyl-ATP; III, N<sub>3</sub>-ATP.

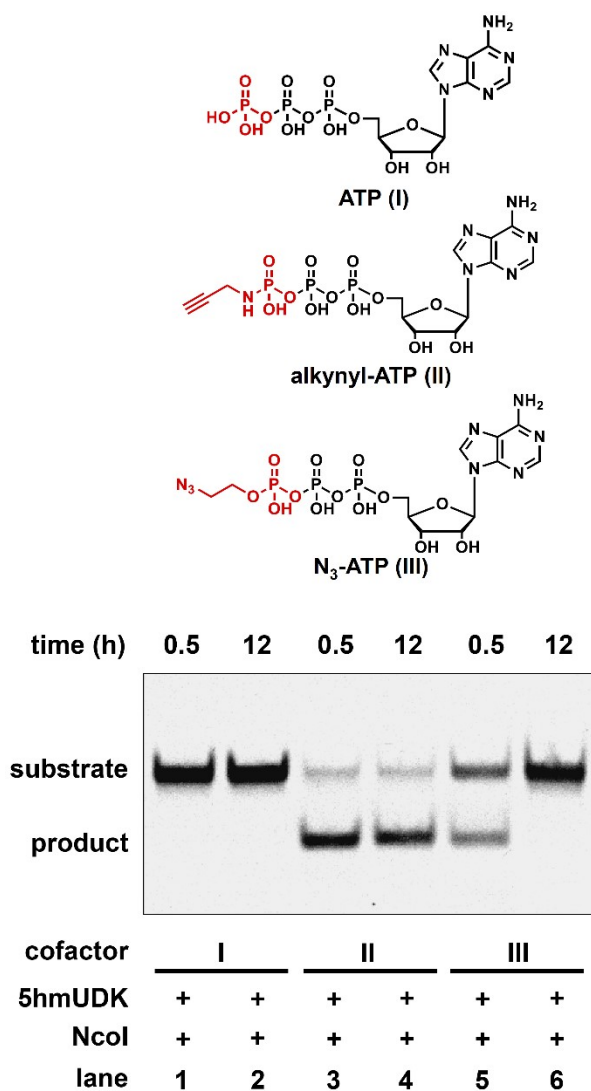

**Figure S3.** Reversal of phosphorylation of 5hmU in 5hmU-DNA by alkaline phosphatase. (A) Schematic diagram of the phosphorylation of 5hmU by 5hmUDK and reversal of phosphorylation of 5hmU by alkaline phosphatase. (B) Analysis of the reversal of phosphorylation of 5hmU by different alkaline phosphatases. Duplex 5hmU-DNA was firstly incubated with 5hmUDK using different cofactor of ATP, alkynyl-ATP, or N<sub>3</sub>-ATP. Then the phosphorylated DNA was treated with different alkaline phosphatases, including CIAP, and SAP, and EAP. The resulting DNA was cleaved by NcoI followed by polyacrylamide gel electrophoresis analysis. I, ATP; II, alkynyl-ATP; III, N<sub>3</sub>-ATP.

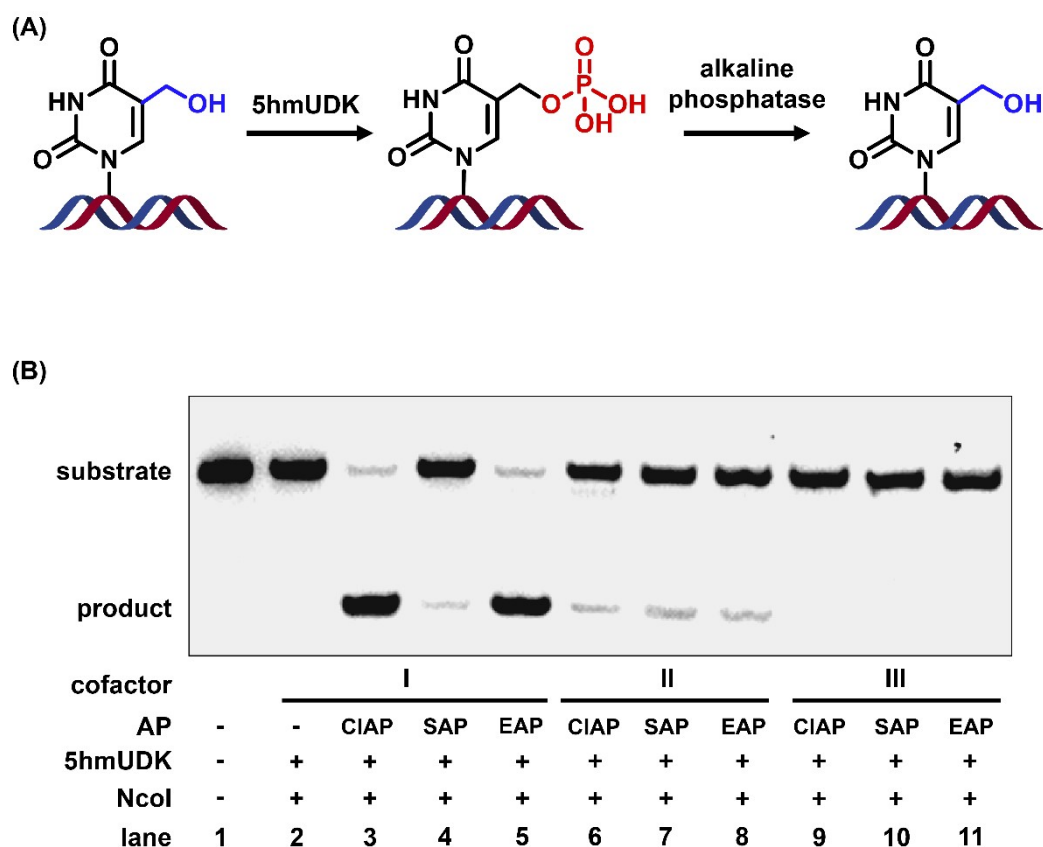

**Figure S4.** Bioorthogonal reaction between N<sub>3</sub>-5hmU and DBCO-Cy3. (A) The schematic diagram of the reaction between N<sub>3</sub>-5hmU and DBCO-Cy3. (B) Evaluation of the bioorthogonal reaction between N<sub>3</sub>-5hmU in different DNA forms and DBCO-Cy3. Single-stranded 5hmU-DNA, duplex 5hmU-DNA (5hmU:A base pair) and duplex 5hmU-DNA (5hmU:G mispair) were incubated with or without 5hmUDK and N<sub>3</sub>-ATP. Then the obtained DNA was reacted with DBCO-Cy3 followed by polyacrylamide gel electrophoresis analysis. Green light excitation was employed to detect Cy3 fluorescence. The reaction between N<sub>3</sub>-5hmU DNA with DBCO-Cy3 led to the slow shift compared to the unlabeled DNA (comparing lanes 2 and 3, lanes 4 and 5), indicating the successful bioorthogonal reaction between N<sub>3</sub>-5hmU DNA and DBCO-Cy3.

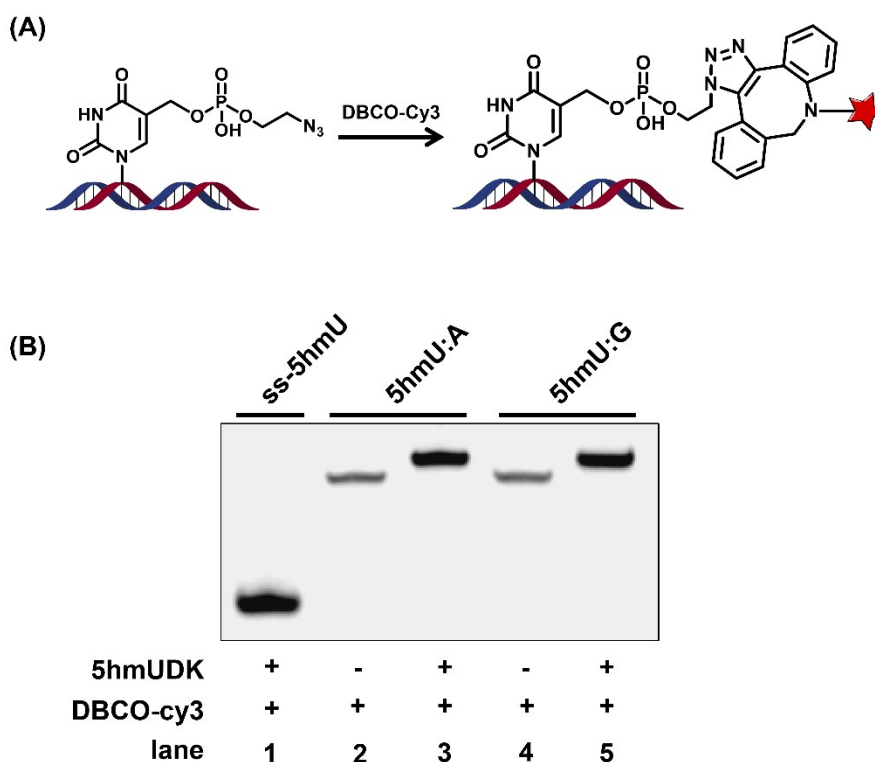

**Figure S5.** LC-UV trace of 5hmU-DNA before (A) and after reaction with N<sub>3</sub>-ATP and DBCO-SS-biotin (B). The LC separation was performed on a Shimadzu VP-ODS column (250 mm × 2.1 mm i.d, 5 μm) with a flow rate of 0.2 mL/min at 40 °C. 100 mM TEAA in water (solvent A) and 100 mM TEAA in acetonitrile (6/4, v/v, solvent B) were employed as mobile phases. A gradient of 0–0.5 min 5% B, 0.5–5 min 5–80% B, 5–7 min 80% B, and 7–16 min 5% B was used.

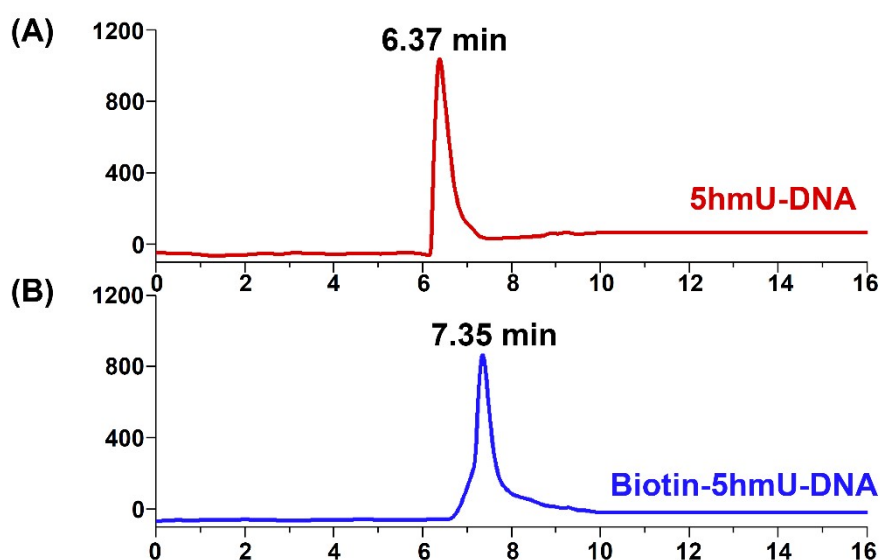

**Figure S6.** Evaluation of the preference of the phosphorylation of 5hmU with ATP or N<sub>3</sub>-ATP as the cofactor by 5hmUDK. (A) ATP and N<sub>3</sub>-ATP were mixed at different ratios (0, 20, 40, 60, 80, and 100%) and incubated with 5hmUDK at 37°C for 30 min. The resulting DNA was incubated with DBCO-SS-biotin followed by polyacrylamide gel electrophoresis analysis. (B) The fractions of biotinylated 5hmU-DNA were plotted against the percentage of N<sub>3</sub>-ATP in the mixture. The slope of 1.05 indicated that 5hmUDK had not preference between ATP and N<sub>3</sub>-ATP.

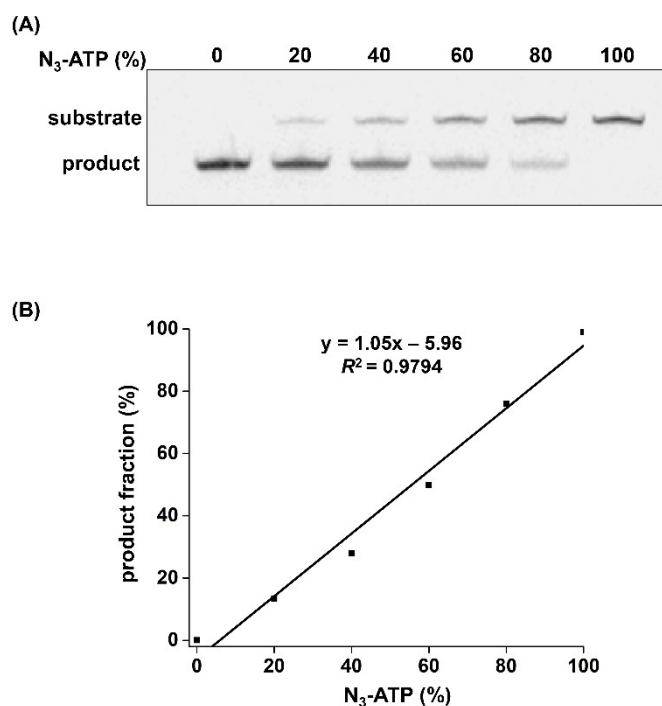

**Figure S7.** Evaluation of the real-time qPCR amplification efficiencies. (A) Standard curve of 60-bp 5hmU-DNA. (B) Standard curve of 129-bp control DNA. The standard curves were constructed with using a series of amounts of DNA templates (0.01, 0.1 1, 10, and 100 pg) for real-time qPCR. The obtained amplification efficiencies of 60-bp 5hmU-DNA and 129-bp control DNA were 103.1% and 90.2%, respectively.

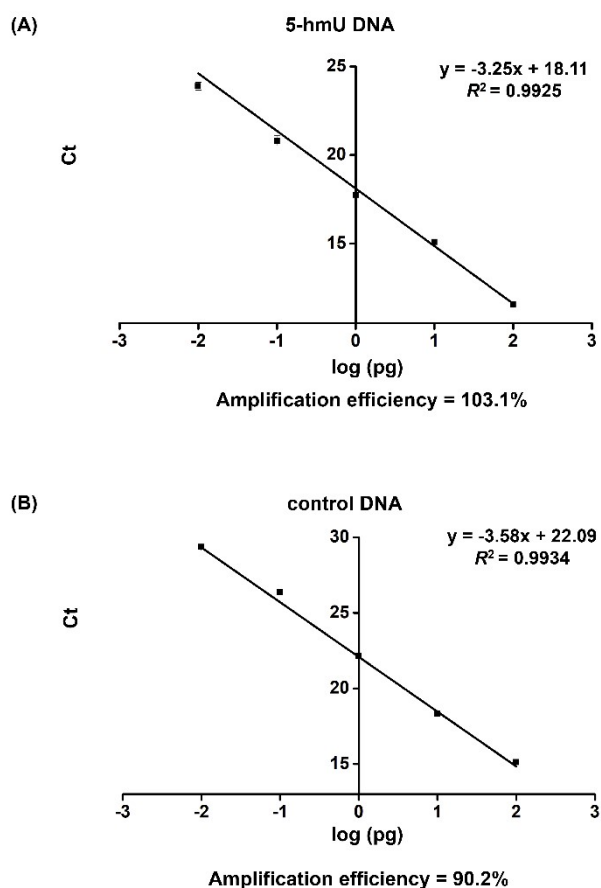

**Figure S8.** The schematic diagram of library preparation for high-throughput sequencing.

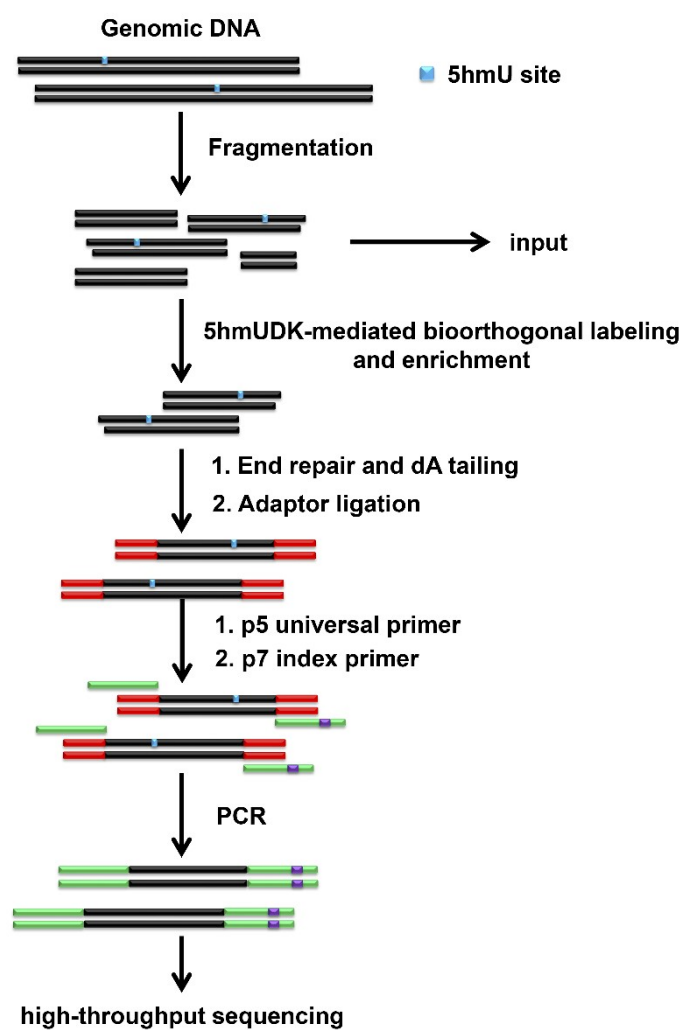

**Figure S9.** The adaptors and primers used for high-throughput sequencing.

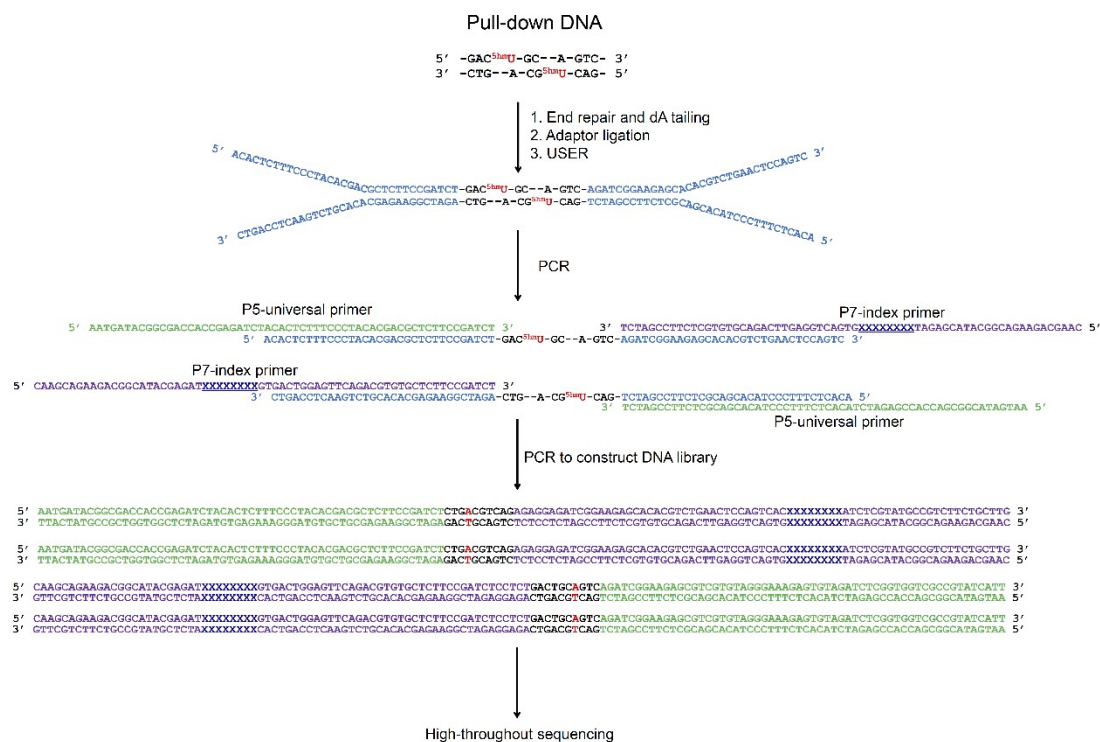

**Figure S10.** The spearman correlation analysis between four samples (input 1, input 2, pull-down 1 and pull-down 2).

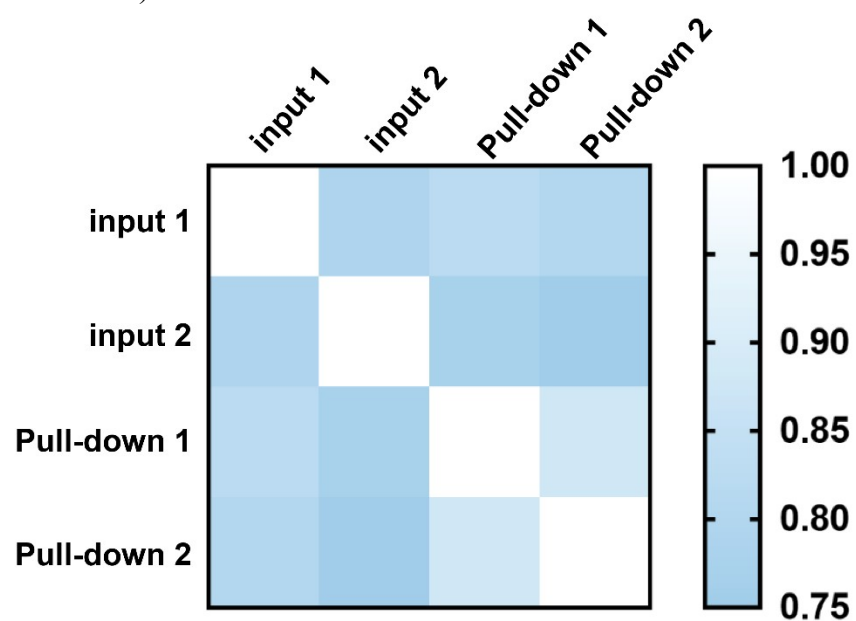

**Figure S11.** Verification of 5hmU peaks in *T. brucei* genome by real-time qPCR. A mixture of 0.1 ng of synthesized 129-bp control DNA and 10  $\mu$ g of fragmented genomic DNA was used for the verification. The mixture was processed sequentially with 5hmUDK treatment (using  $N_3$ -ATP), bioorthogonal labeling (with DBCO-SS-biotin), and streptavidin pull-down. Then 7 different 5hmU-rich regions observed from sequencing results as well as the control DNA were amplified by real-time qPCR to calculate the enrichment folds. (A) The regions amplified by real-time qPCR are from the sequencing peaks that contain the 5hmU. (B) The regions amplified by real-time qPCR are vicinal to the regions of 5hmU peaks ( $\sim 1000$  bp upstream of the regions of 5hmU peaks).

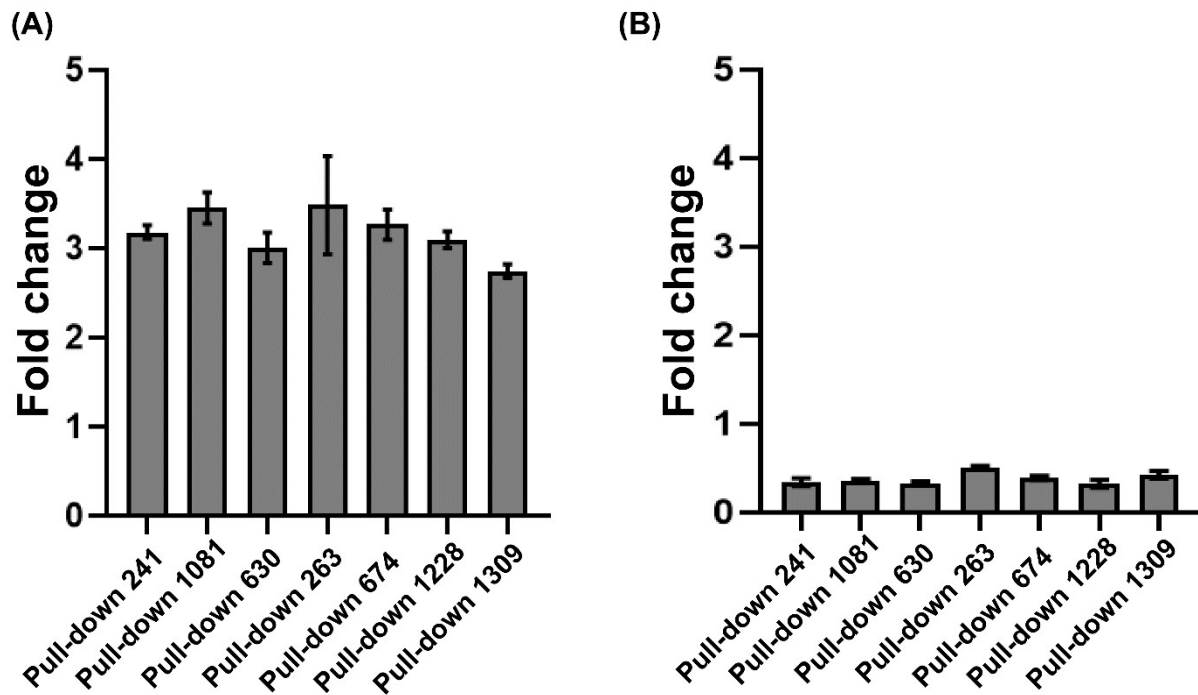

**Figure S12.** The IGVtools view of 5hmU peaks in pull-down samples compared to input sample.

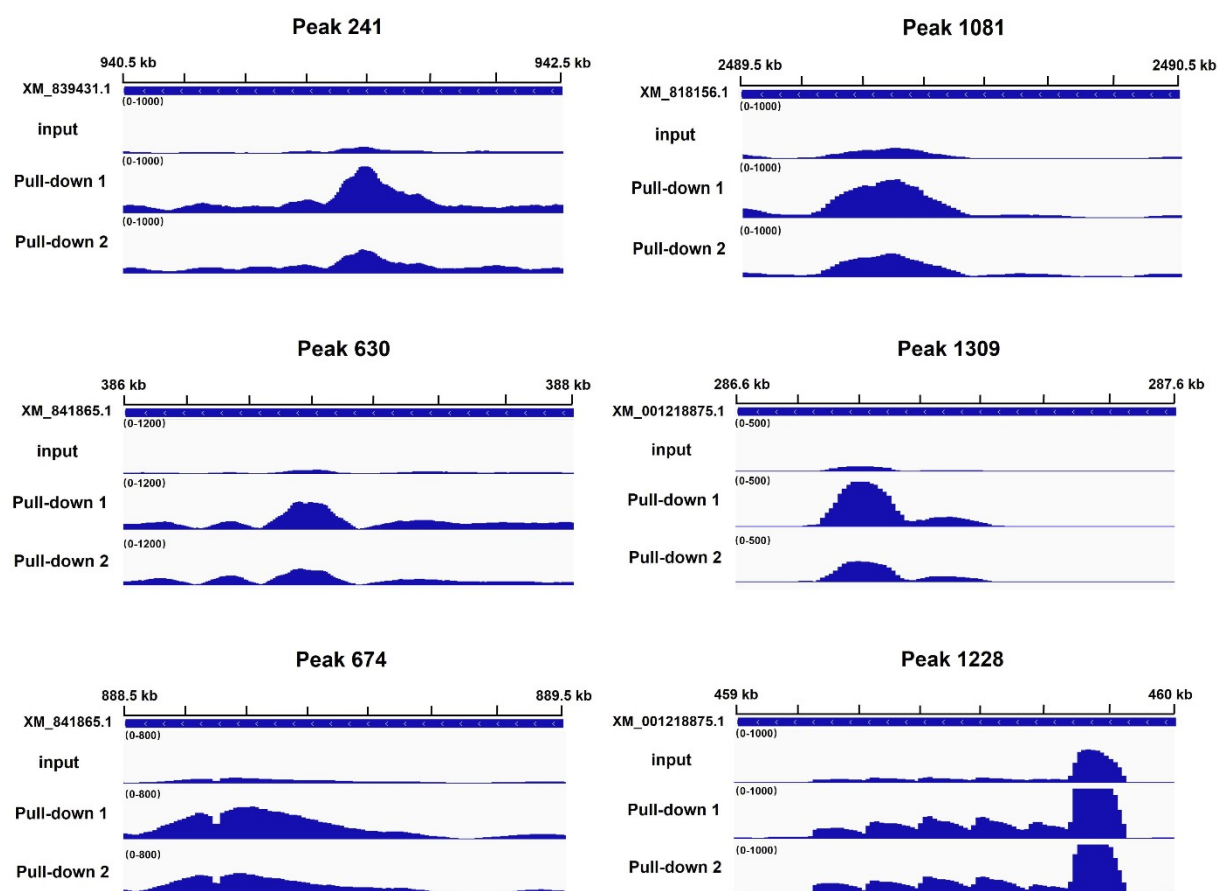

**Figure S13.** Enrichment of 5hmU-containing DNA fragments with using ATP instead of N<sub>3</sub>-ATP. A mixture of 0.1 ng of synthesized 129-bp control DNA and 10 µg of fragmented genomic DNA was used. The mixture was processed sequentially with 5hmUDK treatment (using ATP instead of N<sub>3</sub>-ATP), bioorthogonal labeling (with DBCO-SS-biotin), and streptavidin pull-down. Then 7 different 5hmU-rich regions observed from sequencing results as well as the control DNA were amplified by real-time qPCR to calculate the enrichment folds. Theoretically, ATP doesn't carry the N<sub>3</sub> group, which therefore couldn't be labeled by DBCO-SS-biotin. Thus, 5hmU-containing DNA fragments would not get enriched.

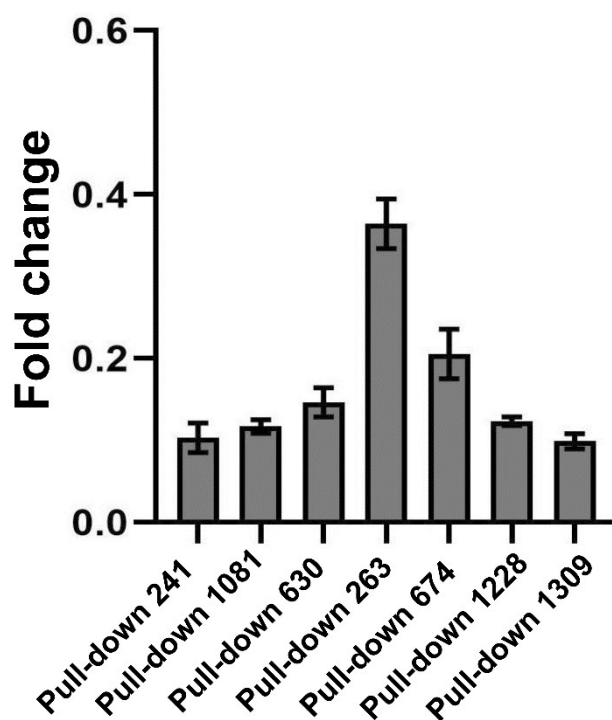

Supplement: d1sc03812e1.pdf [file d1sc03812e1.pdf]
